# Supplementary material for: Replacing HCl by solid acids in industrial processes: synthesis of diamino diphenyl methane (DADPM) for producing polyurethanesElectronic supplementary information (ESI) available: detailed analytical procedures by GC and 1H-NMR techniques. See http://www.rsc.org/suppdata/cc/b4/b406303a/
Source: Royal Society of Chemistry journal article supplement (doi:10.1039/b406303a), 2004-01-01
Supplement: b406303a.pdf [file b406303a.pdf]

### Electronic Supplementary Information

For GC analysis, reaction samples were diluted with methanol (1/10 v/v; Aldrich, 99.9+% purity). 1 µl of diluted sample was injected in a Varian 3900 GC apparatus, equipped with a 30 m HP-5 column and a FID detector. Nitrobenzene (Aldrich, 99+% purity) was used as internal standard to calculate the content in free aniline and the distribution of diamines and triamines.

For  $^1\text{H}$ -NMR analysis samples were exchanged several times with  $\text{D}_2\text{O}$  in order to remove all the labile protons ( $-\text{NH}_2$  and  $\text{HOH}$  signals). Spectra were registered in a 300 MHz Varian Gemini spectrograph using  $\text{CDCl}_3$  as solvent (Aldrich, 99.9 atom %D). Chemical shift is expressed in  $\delta$  (ppm) regarding to the tetramethylsilane used as internal standard. Typically, four different groups of compounds can be quantified by this technique (see Figure 1): primary amines ( $^1\text{H}$ -NMR  $\delta$ : 3.7, s, 2H,  $\text{Ph-CH}_2\text{-Ph}$ ), secondary amines ( $^1\text{H}$ -NMR  $\delta$ : 4.2, s, 2H,  $\text{Ph-NH-CH}_2\text{-Ph}$ ), quinazolines (mainly 3-phenyl-3,4-dihydroquinazoline,  $^1\text{H}$ -NMR  $\delta$ : 4.8, s, 2H,  $\text{Ph-CH}_2\text{-NR}_2$ ), and N-methylated derivatives (basically N-methyl-DADPM,  $^1\text{H}$ -NMR  $\delta$ : 2.7-2.6, s, 3H,  $\text{Ph-NH-CH}_3$ ). Fig. 1 shows spectra corresponding to the analysis of the reaction mixtures obtained with ITQ-2 (a) and Beta-2 (b).

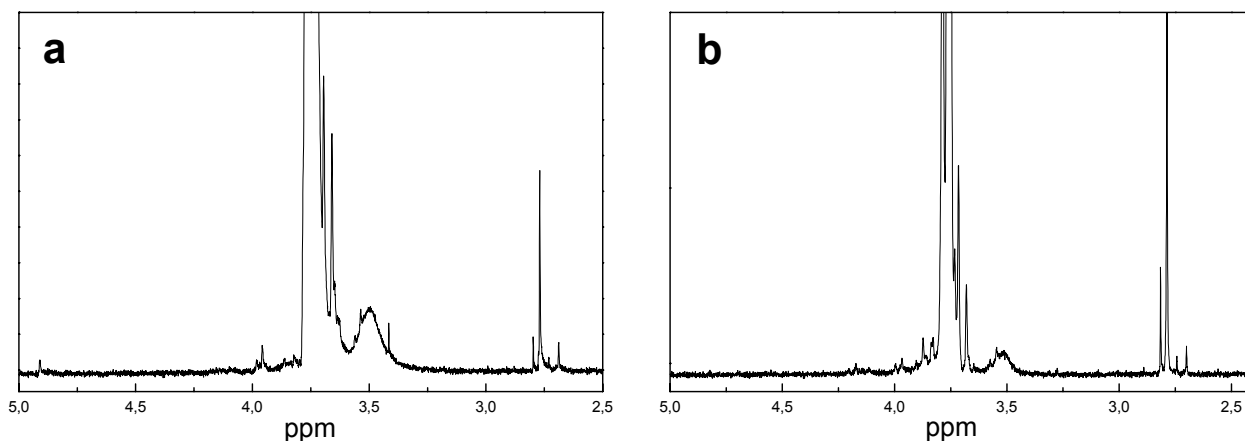

**Figure 1**  $^1\text{H}$ -NMR analysis of reaction samples obtained with ITQ-2 (a) and Beta-2 (b) showing the different groups of products determined. Experimental conditions: A/F=3.0 M (<1%  $\text{H}_2\text{O}$ ); T=150 °C. 20 wt% of catalyst. Reaction time=60 min.. Analytical conditions as in the text.
